1 ***Avian influenza viruses in wild birds: virus evolution in a multi-host***  
2 ***ecosystem***

3 Divya Venkatesh<sup>1</sup>, Marjolein J. Poen<sup>2</sup>, Theo M. Bestebroer<sup>2</sup>, Rachel D. Scheuer<sup>2</sup>,  
4 Oanh Vuong<sup>2</sup>, Mzia Chkhaidze<sup>3</sup>, Anna Machablishvili<sup>3</sup>, Jimsher Mamuchadze<sup>4</sup>, Levan  
5 Ninua<sup>4</sup>, Nadia B. Fedorova<sup>5</sup>, Rebecca A. Halpin<sup>5</sup>, Xudong Lin<sup>5</sup>, Amy Ransier<sup>5</sup>, Timothy  
6 B Stockwell<sup>5</sup>, David E. Wentworth<sup>5\*</sup>, Divya Kriti<sup>6</sup>, Jayeeta Dutta<sup>6</sup>, Harm van Bakel<sup>6</sup>,  
7 Anita Puranik<sup>7</sup>, Marek J Slomka<sup>7</sup>, Steve Essen<sup>7</sup>, Ian H. Brown<sup>7</sup>, Ron A.M.  
8 Fouchier<sup>2</sup>, **Nicola S. Lewis<sup>1,7#</sup>**

9 <sup>1</sup>Department of Zoology, University of Cambridge, Downing Street, Cambridge  
10 CB2 3EJ, United Kingdom

11 <sup>2</sup>Department of Viroscience, Erasmus MC, P.O. Box 2040, 3000CA Rotterdam,  
12 Netherlands

13 <sup>3</sup>National Centre for Disease Control, Tbilisi, Georgia

14 <sup>4</sup>Institute of Ecology, Ilia State University, 3/5 Cholokashvili, Tbilisi, Georgia.

15 <sup>5</sup>J. Craig Venter Institute, Rockville, Maryland, United States of America

16 <sup>6</sup>Icahn School of Medicine at Mount Sinai, New York, United States of America

17 <sup>7</sup>Animal and Plant Health Agency-Weybridge, United Kingdom

18 ***Running title: Evolution of avian influenza viruses in wild birds***

19 #Address correspondence to **Nicola S. Lewis**: nsl25@cam.ac.uk

20 **Abstract**

21 Wild ducks and gulls are the major reservoirs for avian influenza A viruses (AIVs). The  
22 mechanisms that drive AIV evolution are complex at sites where various duck and gull  
23 species from multiple flyways breed, winter or stage. The Republic of Georgia is  
24 located at the intersection of three migratory flyways: Central Asian Flyway, East  
25 Asian/East African Flyway and Black Sea/Mediterranean Flyway. For six consecutive  
26 years (2010-2016), we collected AIV samples from various duck and gull species that  
27 breed, migrate and overwinter in Georgia. We found substantial subtype diversity of  
28 viruses that varied in prevalence from year to year. Low pathogenic (LP)AIV subtypes  
29 included H1N1, H2N3, H2N5, H2N7, H3N8, H4N2, H6N2, H7N3, H7N7, H9N1, H9N3,  
30 H10N4, H10N7, H11N1, H13N2, H13N6, H13N8, H16N3, plus two H5N5 and H5N8  
31 highly pathogenic (HP)AIVs belonging to clade 2.3.4.4. Whole genome phylogenetic  
32 trees showed significant host species lineage restriction for nearly all gene segments  
33 and significant differences for LPAIVs among different host species in observed  
34 reassortment rates, as defined by quantification of phylogenetic incongruence, and in  
35 nucleotide diversity. Hemagglutinin clade 2.3.4.4 H5N8 viruses, circulated in Eurasia  
36 during 2014-2015 did not reassort, but analysis after its subsequent dissemination  
37 during 2016-2017 revealed reassortment in all gene segments except NP and NS.  
38 Some virus lineages appeared to be unrelated to AIVs in wild bird populations in other  
39 regions with maintenance of local AIV viruses in Georgia, whereas other lineages  
40 showed considerable genetic inter-relationship with viruses circulating in other parts  
41 of Eurasia and Africa, despite relative under-sampling in the area.

42

43

44 **Importance**

45 Waterbirds (e.g., gulls/ducks) are natural reservoirs of avian influenza viruses (AIVs)  
46 and have been shown to mediate dispersal of AIV at inter-continental scales during  
47 seasonal migration. The segmented genome of influenza viruses enables viral RNA  
48 from different lineages to mix or re-assort when two viruses infect the same host. Such  
49 reassortant viruses have been identified in most major human influenza pandemics  
50 and several poultry outbreaks. Despite their importance, we have only recently begun  
51 to understand AIV evolution and reassortment in their natural host reservoirs. This  
52 comprehensive study illustrates of AIV evolutionary dynamics within a multi-host  
53 ecosystem at a stop-over site where three major migratory flyways intersect. Our  
54 analysis of this ecosystem over a six-year period provides a snapshot of how these  
55 viruses are linked to global AIV populations. Understanding the evolution of AIVs in  
56 the natural host is imperative to both mitigating the risk of incursion into domestic  
57 poultry and potential risk to mammalian hosts including humans.

## 58 **Introduction**

59 Avian influenza viruses (AIVs) have been identified in a wide diversity of wild and  
60 domestic bird species but wild waterbirds of the Orders *Anseriformes* and  
61 *Charadriiformes*, such as ducks, geese, swans and shorebirds (1, 2) form their natural  
62 reservoir. These birds maintain diverse group of low pathogenic avian influenza A  
63 viruses (LPAIVs), which cause limited morbidity in these host species in experimental  
64 settings (3). The effect of AIV infection in wild birds in non-experimental settings is  
65 more contradictory. Body mass was significantly lower in infected mallards (*Anas*  
66 *platyrhynchos*) and the amount of virus shed by infected juveniles was negatively  
67 correlated with body mass. However, there was no general effect of infection on  
68 staging time (duration of stopover for migratory birds), except for juveniles in  
69 September and LPAIV infection did not affect speed or distance of subsequent  
70 migration (4). Conversely, a recent mallard study demonstrated no obvious detriment  
71 to the bird as movement patterns did not differ between LPAIV infected and uninfected  
72 birds. Hence, LPAIV infection probably does not affect mallard movements during  
73 stopover, consequently resulting in the potential for virus spread along the migration  
74 route (5). The precise role of migrants and resident birds in amplifying and dispersing  
75 AIVs however, remains unclear. In another study the migrant arrivals played a role in  
76 virus amplification rather than seeding a novel variant into a resident population (6). It  
77 has also been suggested that switching transmission dynamics might be a critical  
78 strategy for pathogens such as influenza A viruses associated with mobile hosts such  
79 as wild waterbirds, and that both intra and inter-species transmission are important to  
80 maintaining gene flow across seasons (7).

81

82 AIVs continue to cause both morbidity and mortality in poultry worldwide. Increased  
83 mortality is strongly related to infection with highly pathogenic influenza A viruses  
84 (HPAIVs), characterised by mortality in gallinaceous poultry (8). Periodically, human  
85 infections associated with HPAIV of both the H5 and H7 subtypes have been detected.  
86 In particular, parts of Asia and Africa have been significantly affected by the Eurasian  
87 (goose/Guangdong/1996) lineage H5 HPAIV epizootic for two decades, becoming  
88 enzootic in some areas and multiple waves of influenza with evolving viruses in others  
89 (9). More recently, H5Nx reassortants of the Eurasian lineage HPAIVs from clade  
90 2.3.4.4 have been introduced into wild birds from poultry and spread to new  
91 geographic regions (10).

92 The Caucasus, at the border of Europe and Asia, is important for migration and over-  
93 wintering of wild waterbirds. Three flyways, the Central Asian, East Africa-West Asia,  
94 and Mediterranean/Black Sea flyways, converge in this region. Understanding the  
95 ecology and evolution of AIVs in wild birds is complex, particularly at sites where  
96 multiple species co-habit and in those ecosystems which support different annual life-  
97 cycle stages and where multiple migratory flyways intersect.

98 At a population level, Eurasian dabbling ducks were found to be more frequently  
99 infected than other ducks and Anseriformes (11) with most AIV subtypes detected in  
100 ducks, except H13 and H16 subtypes which were detected primarily in gulls (11, 12).  
101 Temporal and spatial variation in influenza virus prevalence in wild birds was  
102 observed, with AIV prevalence varying by sampling location. In this study site in the  
103 Republic of Georgia, we observed peak prevalence in large gulls during the autumn  
104 migration (5.3-9.8%), but peak prevalence in Black-headed Gulls (*Chroicocephalus*  
105 *ridibundus*) in spring (4.2-13%)(13). In ducks, we observed increased AIV prevalence

106 during the autumn post-moult aggregations and migration stop-over period (6.3%) but  
107 at lower levels to those observed in other more northerly post-moult areas in Eurasia.

108

109 In North America, studies have primarily focused on Anseriformes species with  
110 sampling during late summer and autumn southern migration (14-16), rather than  
111 longitudinally throughout the annual lifecycle of the host or within an ecosystem. The  
112 southwestern Lake Erie Basin is an important stopover site for waterfowl during  
113 migration periods, and over the past 28 years, 8.72% of waterfowl sampled in this  
114 geographic location have been positive for AIV recovery during summer and autumn  
115 (June – December) (17). More recent studies which targeted overwintering and  
116 returning migratory birds during February – April showed the presence of diverse AIV  
117 subtypes in waterbirds at northern latitudes in the United States (17).

118

119 Previous genetic studies of the viruses isolated from wild birds have focused on gene  
120 flow at an intra- or intercontinental level involving multiple hosts, rather than on virus  
121 gene flow among species within an ecosystem (16, 18-20). Indeed, the conclusions of  
122 such studies have been somewhat limited at times by statistical power owing to  
123 insufficient sequence data from enough hosts relevant to virus dynamics across the  
124 geographic study area. (21). In Eurasia, frequent reassortment and co-circulating  
125 lineages were observed for all eight genomic RNA segments over time. Although,  
126 there was no apparent species-specific effect on the diversity of the AIVs, there was  
127 a spatial and temporal relationship between the Eurasian sequences and significant  
128 viral migration of AIVs from West Eurasia towards Central Eurasia (22).

129

130 This study presents novel findings concerning the ecology and evolution of both  
131 LPAIVs and HPAIVs circulating in wild birds in a key active surveillance site in Eurasia.  
132 We investigated the diffusion of AIV gene segments within different wild bird hosts  
133 occupying the same ecosystem. There was substantial diversity in surface  
134 glycoprotein HA (hemagglutinin) and NA (neuraminidase) subtypes, which varied  
135 year to year and with the host species. M, NS, NP, PB1, PB2 and PA (henceforth  
136 referred to as “internal” gene segments) also showed host restriction to various  
137 degrees. There were differences in genetic diversity, reassortment rates, and inter-  
138 species transmission rates in the internal gene segments associated with different  
139 host species and HA subtypes. We also examined how closely related the Georgian  
140 AIV gene segments were to AIV globally. We found evidence for genetic inter-  
141 relationship of Georgian AIV with AIV in mainly Africa and Eurasia but several lineages  
142 appear to be maintained locally.

143

144

145 **Methods**

146 Active surveillance for influenza A viruses was carried out from 2010-2016 as  
147 described previously (13)

148 ***Dataset and genomic sequencing***

149 Over a period of six years, 30,911 samples from 105 different bird species were  
150 analysed for the presence of AIVs. Positive isolates were obtained by standard  
151 approaches (23), and where possible, subtyped and sequence generated from  
152 extracted RNA as described below.

153 For virus samples from 2010-2012, codon complete genomes of IAV were  
154 sequenced as part of the Influenza Genome Project  
155 (<http://gcid.jcvi.org/projects/gsc/influenza/index.php>), an initiative by the National  
156 Institute of Allergies and Infectious Diseases (NIAID). IAV viral RNA (vRNA) was  
157 isolated from the samples/specimens, and the entire genome was amplified from 3 ul  
158 of RNA template using a multi-segment RT-PCR strategy (M-RTPCR) (24, 25). The  
159 amplicons were sequenced using the Ion Torrent PGM (Thermo Fisher Scientific,  
160 Waltham, Massachusetts, USA) and/or the Illumina MiSeq v2 (Illumina, Inc., San  
161 Diego, California, USA) instruments. When sequencing data from both platforms was  
162 available, the data were merged and assembled together; the resulting consensus  
163 sequences were supported by reads from both technologies. Sequence data for  
164 Georgia was downloaded from the NIAID Influenza Research Database (IRD)  
165 (Squires et al. 2012) through the web site at <http://www.fludb.org> on 11/5/2016. To this  
166 dataset, we added sequence data for isolates from 2013 and 2016 which were  
167 sequenced at either Erasmus MC, Animal and Plant Health Agency (APHA) or the  
168 Icahn School of Medicine at Mount Sinai (ISMMS). At Erasmus MC sequencing was  
169 performed as described previously by V. J. Munster et al. (26), with modifications.



170 Primer sequences are available upon request.

171 At APHA, viral RNA was extracted using the QIAquick Viral RNA extraction kit  
172 (Qiagen, UK) without the addition of carrier. Double stranded cDNA (cDNA synthesis  
173 system, Roche, UK) was generated from RNA according to the manufacturer's  
174 instructions. This was quantified using the fluorescent PicoGreen reagent and 1ng was  
175 used as a template for the preparation of the sequencing library (NexteraXT, Illumina,  
176 Cambridge, UK). Sequencing libraries were run on a MiSeq instrument (Illumina,  
177 Cambridge, UK) with 2x75 base paired end reads. Data handling of raw sequence  
178 reads and extraction of consensus sequences were performed at APHA.

179 For the Icahn School of medicine at Mount Sinai, RNA was extracted using the  
180 QIAamp Viral RNA Mini Kit (52904, Qiagen, UK). MS-RT-PCR amplification was  
181 performed with the Superscript III high-fidelity RT-PCR kit (12574-023, Invitrogen)  
182 according to manufacturer's instructions using the Opti1 primer set: Opti1-F1 5'  
183 GTTACGCGCCAGCAAAAGCAGG, Opti1-F2 5'GTTACGCGCCAGCGAAAGCAGG  
184 and Opti1-R15'GTTACGCGCCAGTAGAAACAAGG. DNA amplicons were purified  
185 using Agencourt AMPure XP 5ml Kit (A63880, Beckman Coulter). At the Icahn School  
186 of Medicine, sequencing libraries were prepared and sequencing was performed on a  
187 MiSeq instrument (Illumina, Cambridge, UK) with 2x150 base paired end reads. Data  
188 handling of raw sequence reads and extraction of consensus sequences were  
189 performed at ISMMS, as described previously (27).

## 190 ***Genetic analyses***

### 191 ***Sequence alignment preparation***

192 Whole genome sequences from 81 Georgian strains isolated between 2010  
193 and 2016 are used in this analysis. We aligned sequences from each gene segment  
194 separately using MAFFT v7.305b (28) and trimmed to starting ATG and STOP codon

195 in Aliview v1.18. Hemagglutinin (HA) sequences were further trimmed to exclude the  
196 initial signal sequence (29, 30). Sequences were then aligned using “muscle-codon”  
197 option with default settings in MEGA7 (31).

198 The NS gene has two alleles A and B, with significant difference in sequence  
199 composition, which could skew analyses of sequence diversity. The NS gene  
200 sequences were therefore considered both as a complete dataset (NS) and  
201 subdivided into NS-A and NS-B datasets where required. As only six out of 81  
202 sequenced strains had the NS-A allele, only NS and NS-B datasets were used in the  
203 analyses.

204 We then subdivided the complete datasets of each gene according to viral  
205 traits, namely:

- 206 • host group (gull and duck)
- 207 • host type
  - 208 ○ **BMG**: Black-headed Gulls (*Chroicocephalus ridibundus*) and  
209 Mediterranean Gulls (*Ichthyaetus melanocephalus*).
  - 210 ○ **YAG**: Yellow-legged Gulls (*Larus michahellis*) and Armenian Gulls  
211 (*Larus armenicus*).
  - 212 ○ **MD**: Mallards (*Anas platyrhynchos*).
  - 213 ○ **OD**: Other ducks. This includes the common teal (*Anas crecca*),  
214 domestic duck (*Anas platyrhynchos domesticus*), garganey (*Anas  
215 querquedula*), northern shoveler (*Anas clypeata*), common coot (*Fulica  
216 atra*), and tufted duck (*Aythya fuligula*).

- 217       • HA subtype. Dataset was reduced to include subtypes H1, 2, 3,4, 5, 6, 7, 9,10,  
218       11, 13 where greater than three sequences were available for statistical  
219       analyses.

### 220 ***Visualisation of phylogenetic incongruence***

221       We inferred Maximum Likelihood (ML) phylogenetic trees for each gene  
222       segment using IQ-TREE, 1.5.5 (32) and ModelFinder (33) and obtained branch  
223       supports with SH-like approximate Likelihood Ratio Test (aLRT) and standard non-  
224       parametric bootstrap. All trees were rooted using the “best-fitting-root” function in  
225       Tempest v1.5 (34) and visualised in FigTree v1.4.2, with increasing node-order. To  
226       visualise incongruence, we traced the phylogenetic position of each sequence,  
227       coloured according to host, across unrooted ML trees for all internal gene segments.  
228       Figures were generated by modifying scripts from a similar analysis (35).

### 229 ***Quantification of nucleotide diversity***

230       Complete alignments of each internal gene, as well as alignment subsets by host  
231       group, host type and HA subtype were used in “PopGenome” package in R v3.2 (36)  
232       to estimate nucleotide diversity. Per-site diversity was calculated by dividing the  
233       nucleotide diversity output by number of sites present in each alignment. As each  
234       subset contained different numbers of sequences, this value was normalised by  
235       dividing by the number of sequences in each respective dataset. Heat maps from this  
236       data were plotted in R v3.2.

### 237 ***Correlating traits with phylogeny (BaTS)***

238       Null hypothesis of no association between phylogenetic ancestry and traits (host  
239       group, host type and HA subtype) was tested using Bayesian Tip-association  
240       Significance Testing (BaTS) beta build 2 (37) for all internal gene segments. Bayesian

241 posterior sets of trees were inferred using MrBayes v3.2.6 (38) using the same  
242 segment-wise alignments generated for ML tree estimation. A set of scripts and  
243 commands used to generate the input file for BaTS are provided in [Supplementary  
244 materials]. Ratio of clustering by each trait on the gene segment trees that is expected  
245 by chance alone (Null mean), with the association that is observed in the data  
246 (Observed mean) was calculated. These expected/observed ratios were summarized  
247 in a heat-map with the y-axis ordered by the amount of reassortment observed. Data  
248 manipulation and figure preparation was done in R v3.2.

#### 249 ***Quantification of diversity and between host transmission***

250 Alignments generated for ML trees were also used in Bayesian phylodynamic  
251 analyses using BEAST v1.8.4 (39). We employed a strict molecular clock, a  
252 coalescent constant tree prior and the SRD06 site model with two partitions for codon  
253 positions (1<sup>st</sup>+2<sup>nd</sup> positions, 3<sup>rd</sup> position), with base frequencies unlinked across all  
254 codon positions. The MCMC chain was run twice for 100 million iterations, with sub-  
255 sampling every 10,000 iterations. All parameters reached convergence, as assessed  
256 visually using Tracer (v.1.6.0). Log combiner (v1.8.4) was used to remove initial 10%  
257 of the chain as burn-in, and merge log and trees files output from the two MCMC runs.  
258 Maximum clade credibility (MCC) trees were summarized using TreeAnnotator  
259 (v.1.8.4). After removal of burn-in, the trees were analysed using PACT (Posterior  
260 analysis of coalescent trees) (<https://github.com/trvrb/PACT.git>) to determine  
261 measures of diversity, and migration rates between hosts over time.

#### 262 ***Geographical context for 'Georgian origin' internal protein coding gene 263 segments***

264 Internal gene sequences from, avian hosts, sampled across the world between 2005  
265 and 2017 were obtained from gisaid.org (downloaded November 2017). Sequences

266 (each segment separately) were divided into regions namely Asia (including Oceania),  
267 Europe, Africa, North America and South America. The program cd-hit-est (40, 41)  
268 was used to down-sample each regional dataset to 0.9 similarity cut-off level. These  
269 down-sampled sequences were then merged with the Georgian dataset. Discrete trait  
270 ancestral reconstruction with symmetric and asymmetric models were implemented in  
271 BEAST v1.8.4 (39) together with marginal likelihood estimation using path-  
272 sampling/stepping-stone analysis. The symmetric model was chosen over the  
273 asymmetric (log Bayes factor =14). The MCMC chain was run twice for 100 million  
274 iterations, with sub-sampling every 10,000 iterations. All parameters reached  
275 convergence, as assessed visually using Tracer (v.1.6.0). Log combiner (v1.8.4) was  
276 used to remove initial 10% of the chain as burn-in, and merge log and trees files output  
277 from the two MCMC runs. Maximum clade credibility (MCC) trees were summarized  
278 using TreeAnnotator (v.1.8.4). PACT was used to extract overall migration rates  
279 between trait locations.

## 280 **Results**

### 281 ***HA-NA subtype diversity and host-specificity***

282 Over the six-year period between 2010 and 2016, 24 HA/NA subtypes of influenza  
283 A virus, including 12 different HA subtypes (H1, 2, 3, 4, 5, 6, 7, 9, 10, 11, 13, and 16)  
284 were isolated (Figure 1A). The diversity of subtypes varied from year to year, and  
285 associated with the level of prevalence in duck versus gull hosts. Within our sampling  
286 in Georgia, H9, H13 subtypes are found exclusively in gulls, while H1, H5, and H7  
287 were detected exclusively in mallards. H3, H4, H6, and H10 were found in mallards  
288 and various other ducks. Positive evidence for multiple-species infection (ducks and

289 gulls) was found only for H2 and H11 viruses in this dataset even though globally,  
290 many other subtypes are found in multiple hosts.

291 In the first three years between 2010-12, up to seven different HA subtypes were  
292 found every year. These included H1, 2, 3, 4, 6, 10, 11, 13, and 16. H13, which was  
293 found in the greatest proportion of sequenced samples in 2011 and 2012 and was the  
294 sole type sequenced in 2013. In 2014, again only a single subtype was found (H10).  
295 The absence of more subtypes in these years could be explained by the comparatively  
296 low prevalence of IAV in these years, in both gulls and ducks in 2014 and especially  
297 ducks in 2013 (Figure 1B). In 2015, where prevalence was nearly zero in gulls, we  
298 saw HPAI H5 type viruses detected along with an H6. H4, which was previously  
299 isolated only in 2011, was the predominant type in 2016, followed by H5 and H7.

### 300 ***Genetic structure of AIV detected in Georgia in 2010-16***

301 For all gene segments except PA, there were two major subdivisions in tree topology  
302 – one clade containing sequences predominantly from ducks and one clade entirely  
303 derived from gull sequences (Figure 2, S2). The internal protein coding gene segments  
304 from certain subtypes formed sub-clades that were defined by year of circulation  
305 suggesting single-variant epidemic-like transmission within the population. This was  
306 seen in H13N8 in gulls and H4N6 and H5N8 in ducks. There were several examples  
307 of gull-derived viruses, which had several internal gene segments (other than NP)  
308 located in the ‘duck’ clade, mostly derived from Black-headed and Mediterranean  
309 Gulls (BMG). Only the PA gene phylogeny had an occurrence of a small sub-clade of  
310 Yellow-legged and Armenian Gull-derived (YAG) viruses clustered within the duck-  
311 derived viruses. For M gene segment, there were two major clades entirely defined by  
312 host species (except for 2 BMG viruses), and an outlier sub-clade consisting of H2  
313 and H9 gull lineage viruses from BMGs. In PB1, PB2 and PA, these outlier- sub-clade

314 viruses were found in various configurations in the tree. For NS, the tree topology  
315 divided into two alleles as reported previously (42). However, there were only six  
316 viruses from Allele *A* isolated from four mallards (MD), a garganey (OD) and a  
317 common teal (OD). Allele *B* splits into two sub-clades again defined by whether the  
318 viruses were isolated from gulls or ducks. The ‘duck’ sub-clade includes the outlier  
319 BMG viruses identified above for M. The long branch length to the gull sub-clade from  
320 the duck sub-clade in Allele *B* would suggest that there might be host-specificity in NS  
321 evolution, perhaps in response to differences between avian host innate immune  
322 responses.

### 323 ***Variation in nucleotide diversity***

324 We used the PopGenome package in R to calculate the per-site nucleotide  
325 diversity for all internal gene segments (Figure 3A-C). Nucleotide diversity of the  
326 internal gene segments in one surveillance site may be an indication of the breadth of  
327 sources where the viruses have been derived from. We found greater diversity in both  
328 gulls and ducks in gene segment NS (possibly because of the presence of both *A* and  
329 *B* alleles of this gene in the dataset) and PB2 (Figure 3A). When further sub-divided  
330 into “host types” as described in the methods, we found that the group of Black-headed  
331 and Mediterranean Gulls (BMG) had the highest per-site diversity. In comparison, the  
332 mallards (MD), the Yellow-legged and Armenian Gulls (YAG) and other ducks (OD)  
333 had relatively lower values across all internal gene segments, despite the OD  
334 comprising of a variety of ducks. Only the PA gene had greater diversity in Yellow-  
335 legged and Armenian Gulls than in Black-headed and Mediterranean Gulls (Figure  
336 3B). When subset by HA subtype (Figure 3C), the internal gene segments associated  
337 with H4 and H13, the most abundant types found in our dataset, had the lowest  
338 diversity – possibly because several of the isolates were detected at the same time.

339 Those less commonly isolated, such as H11 was detected in different years (2011,  
340 2014) which may explain the high diversity of its NS, M, NP, PA, PB1, and PB2 gene  
341 segments. However, H3, which also has relatively high diversity were both detected  
342 at the same time (September 2011). Both NS and NS-B datasets were used in the  
343 analysis and as expected, the exclusion of sequences of NS-A (found exclusively in  
344 viruses from duck hosts), lowers the overall diversity within the ducks even when the  
345 values are normalised for the number of sequences found in each subset.

346 We tested the root-to-tip regression for ML trees for each of the six internal protein  
347 coding gene segments using Tempest v1.5 (34) to look for temporal signatures. All  
348 except NS gene showed positive correlation of distance with time, despite the short  
349 window of six years (Figure S1A). NS root to tip regression shows a negative slope,  
350 and it is likely confounded by the presence of two alleles A and B. Therefore, only NS-  
351 B allele, which forms a dominant portion of the NS gene segments in the data-set (75  
352 out of 81), and shows clock-likeness (Figure S1B) were used for further analysis using  
353 BEAST v1.8.4. PACT analysis showed that the overall and yearly host-related  
354 diversity measures (Figure 4 A and B) show similar trends as seen in Figure 3.

### 355 ***Correlation of traits with phylogeny***

356 We tested the null hypothesis that there is no association between phylogenetic  
357 ancestry and traits (host group, host type and HA subtype) using Bayesian Tip-  
358 association Significance Testing (BaTS). Ratio of clustering by each trait on the gene  
359 segment trees that is expected by chance alone (Null mean), with the association that  
360 is observed in the data (Observed mean) are presented in Figure 5 (A-C). The higher  
361 the value of null/observed, the lower is the support for phylogenetic clustering of the  
362 given trait. Therefore, a higher value indicates a different ancestry. Hence, when we  
363 consider the HA subtype trait as “lineage”, it provides a measure of reassortment as



364 described (43). Again, NS-B dataset was considered along with the complete NS  
365 dataset but no significant differences in trends were found. Panel A shows that gull  
366 viruses are more likely to cluster together in a phylogenetic tree than duck viruses in  
367 general. When viruses of gulls and ducks were further subdivided, panel B shows that  
368 OD viruses are less likely to cluster together in the tree, which is expected given that  
369 we have grouped together several duck species under this category. Among the rest,  
370 again it is the duck species (MD) that exhibit dynamic phylogenetic placing compared  
371 to both the gull types. The only exception is with the PB2 gene segment, for which the  
372 BMG show a lower level of phylogenetic clustering by species indicating putative  
373 reassortment events. When we consider the HA subtype (lineage) of the viruses, we  
374 find that H4 and H13, which showed the lowest nucleotide diversity, also show very  
375 low levels of reassortment, as does H5. There was not enough statistical power to  
376 interpret events in H1, 3, 6, 7, 9 or 11 viruses. Where statistically significant values  
377 were found, lower levels of clustering were observed.

### 378 ***Directionality of viral gene segment transfer***

379 Figure S3 shows ancestral reconstruction of the host state along time-scaled  
380 phylogenies for five of six internal gene segments. The results are summarised in  
381 Figure 6A showing the mean number of host jump events from duck to gull and vice-  
382 versa. For all gene segments, most of the host spillover events are in the direction  
383 from ducks to gulls. In figure 6B we see that at a finer level, most of the host jump  
384 events happen within the duck (mallards (MD) to other ducks (OD)) and gull (Black-  
385 headed and Mediterranean Gulls (BMG) to Yellow-legged and Armenian Gulls (YAG)  
386 and *vice versa*) species. In transmissions from ducks to gulls it is largely noticeable  
387 only from MD to BMG. This likely explains the higher levels of nucleotide diversity and  
388 reassortment rates in the BMG viruses relative to YAG seen above.

### 389 ***Geographical context for GE NS, M, NP, PA, PB1, PB2 segments***

390 To determine the origin and destination of the internal protein coding gene segments  
391 found in viruses isolated in Georgia, we analysed our sequence dataset together with  
392 avian influenza sequences from a broader timeframe (2005-2016) and regional  
393 sampling. Figure 7A shows the genealogy for the NP gene for whose tips we know the  
394 location of sampling and whose internal nodes are estimated using discrete-state  
395 ancestral reconstruction in BEAST. Clades in which Georgian sequences occur are  
396 highlighted. Figure 7B summarises the genealogy in a circularised graph in which the  
397 arrowheads indicate the direction of transfer and the width of the arrow indicate the  
398 rate of transfer to different locations. The analyses reveal viruses from the Atlantic and  
399 Afro-Eurasian locations form largely separate clades, which is consistent with previous  
400 studies (44, 45). However, we do find instances of transmission across this divide,  
401 most notably to and from Asia and Europe. Many NP genes from Georgia cluster with  
402 other Georgian NP genes, in some cases forming the terminal branches spanning  
403 years indicating restriction to local spread. However, our dataset contains the latest  
404 Georgian sequences, and sequences from this timeframe were not available from the  
405 rest of Eurasia. Hence, we can expect to have missed identifying onward transmission.  
406 From the transmission we do identify, it appears that there is considerable migration  
407 into Africa and Europe and to a lesser extent to Southern/Eastern Asia. Most of the  
408 sequences transmitted into Georgia come from Asia and Europe, along with a single  
409 identified instance of direct transfer from North America.

### 410 **Discussion**

411 Wild birds have been shown to harbor substantial genetic diversity of avian  
412 influenza viruses. This study showed the diversity not only varied by year but was  
413 associated with the level of overall prevalence in different wild bird host species, perhaps

414 influencing the observed rates and diversity if prevalence were low. From these  
415 results, there is little evidence that one species group maintains all influenza A virus  
416 diversity, there appears to be relative host-restriction in many subtypes (except for H2  
417 and H11 viruses) and there are differences in prevalence dynamics depending on  
418 host. Therefore, one host is not representative of influenza A virus prevalence,  
419 dynamics and diversity across the wild bird reservoir. Within both ducks and gulls  
420 however, peak prevalence was consistently observed in hatch-year birds and with a  
421 more restricted subtype diversity, suggesting that there is an initial influenza A virus  
422 epidemic wave as naïve birds aggregate in their first year. Subsequently in the over-  
423 wintering period, a wider subtype diversity was observed in both host groups and  
424 adults were more frequently infected. This suggests that disease dynamics are  
425 complex and influenced by multiple host factors including age and annual life cycle  
426 stage.

427 It has previously been observed that some subtypes are routinely and nearly  
428 exclusively isolated from certain host families/genus, the most notable example being  
429 H13 and H16 viruses from gulls. However, mixed infections are relatively common but  
430 might be masked if subtype characterization requires virus isolation, therefore putting  
431 the clinical specimen through a culture bottleneck. Advances in sequencing direct from  
432 clinical material would more accurately (remove possible culture selection bias)  
433 establish the prevalence, subtype diversity and genetic diversity within wild birds.

434 In general, for all gene segments except PA, we identify strong patterns of clade  
435 topology defined by host. This suggests that there is segregated gene flow through  
436 these host populations with little inter-host reassortment. Additionally, within our study  
437 period there were large scale perturbations in ecology which might also influence our

438 prevalence and subtype diversity estimates. For example, in 2014 and 2015 there was  
439 widespread reproductive failure in two gull host species due to nest flooding (Yellow-  
440 legged Gulls) and few returning adults to the colony (Armenian Gulls), and therefore  
441 few juveniles from which to detect the annual epidemic wave. The occurrence and  
442 significance of such ecological fluctuations on disease dynamics are unclear. We also  
443 increased the ability to sample migrant ducks in late summer and early autumn from  
444 August 2015 by constructing a duck trap in the newly created National Park. Again,  
445 this addition to sampling strategy likely increased the detection of influenza in these  
446 anseriform hosts as they were previously under-sampled.

447 We tested whether certain hosts maintained higher levels of nucleotide diversity in  
448 the non-immune related internal genes. PB2 and NS were the most genetically diverse  
449 in both gulls and ducks. Within host-group, Black-headed and Mediterranean Gull-  
450 derived viruses showed highest per-site diversity, Yellow-legged and Armenian Gulls  
451 lower diversity, likely because some of the viruses of the former were associated with  
452 reassortants probably derived from ducks (or another unsampled host group). While  
453 despite high rates of reassortment and spillover between duck subgroups mallards  
454 (MD) and other ducks (OD), the absence of any gull derived viruses in these ducks  
455 keeps their diversity levels lower compared to gulls/BMG.

456 Where gene flow does occur between host groups, for all gene segments, host-  
457 spillover events were in the direction of ducks to gulls and from other ducks to Black-  
458 headed and Mediterranean Gulls, likely explaining the higher levels of nucleotide  
459 diversity in these gulls observed above. Where HA and NA gene segments were  
460 acquired by gulls from ducks, there was a pre-requisite for a gull-clade internal gene  
461 cassette suggesting a host-restrictive effect for onward maintenance within the gull

462 population (11, 46). Interestingly, Black-headed and Mediterranean Gulls only occur  
463 on the study site in the over-wintering period where there are also high densities of  
464 over-wintering ducks from other geographic areas. Although there is a duck-gull  
465 interface on the breeding grounds in summer, the duck densities are very much lower,  
466 perhaps suggesting that there is a threshold level of bird density that allows gene flow  
467 among hosts.

468 If we look at diversity by HA subtype, H4 and H13 were the least diverse and  
469 showed the lowest rates of reassortment and were also associated with hatch-year  
470 bird infections, suggesting a clonal expansion and epidemic gene flow through these  
471 birds. The 2014-2015 HPAI H5 epizootic also showed no reassortment unlike the  
472 2016-2017 HPAI H5 viruses, perhaps indicating that the first wave of 2.3.4.4 viruses  
473 diffused through the wild bird population similarly to a 'naïve' infection, and subsequent  
474 epizootics have resulted in altered pathogen evolution strategies to maintain gene  
475 flow, similar to those previously observed in North America when considering the effect  
476 of latitude on gene flow (7).

477 When we examine the internal gene segments of the Georgian AIV in a broader  
478 geographical context, we find significant gene flow to and from Georgia with Europe  
479 and the rest of Asia, although data for Africa is very limited. Crossover into the Atlantic  
480 flyway appears to be mediated largely by gulls with some exceptions, notably the  
481 H5N1-NP gene that was transmitted between ducks.

482 From this study, the diffusion of avian influenza viruses within a multi-host  
483 ecosystem is heterogeneous. One host group cannot therefore be used as a surrogate  
484 for others. It is likely that virus evolution in these natural eco-systems is a complex mix  
485 of host-pathogen interface and ecological factors. Understanding such drivers is key

486 to investigating these emerging pathogens, interpreting the data from different sites  
487 around the world and ultimately informing risk of incursion of emerging variants from  
488 one geographic region to another.

489 Acknowledgements:

490 This study including field work and sequencing was funded by National Institute of  
491 Allergy and Infectious Diseases, National Institutes of Health, Department of Health  
492 and Human Services contract No.HHSN2722000900007C  
493 and HHSN266200700010C “NIAID Centres of Excellence for Influenza Research and  
494 Surveillance”  
495 <http://www.niaid.nih.gov/LabsAndResources/resources/ceirs/Pages/crip.aspx>, and a  
496 DTRA FRCWMD Broad Agency Announcement (HDTRA1-09-14-FRCWMD  
497 GRANT11177182). The funders had no role in study design, data collection and  
498 analysis, decision to publish, or preparation of the manuscript. The sequencing data  
499 for this manuscript was generated while D. E. Wentworth was employed at the J. Craig  
500 Venter Institute. The opinions expressed in this article are the author's own and do not  
501 reflect the view of the Centers for Disease Control and Prevention, the Department of  
502 Health and Human Services, or the United States government.

503 References

- 504 1. Olsen B, Munster VJ, Wallensten A, Waldenstrom J, Osterhaus AD, Fouchier RA.  
505 2006. Global patterns of influenza A virus in wild birds. *Science* 312:384-8.
- 506 2. Webster RG, Bean WJ, Gorman OT, Chambers TM, Kawaoka Y. 1992. Evolution and  
507 ecology of influenza A viruses. *Microbiol Rev* 56:152-79.
- 508 3. Gunnarsson G, Jourdain E, Waldenstrom J, Helander B, Lindberg P, Elmberg J,  
509 Latorre-Margalef N, Olsen B. 2010. Zero prevalence of influenza A virus in two raptor  
510 species by standard screening. *Vector Borne Zoonotic Dis* 10:387-90.
- 511 4. Latorre-Margalef N, Gunnarsson G, Munster VJ, Fouchier RA, Osterhaus AD, Elmberg  
512 J, Olsen B, Wallensten A, Haemig PD, Fransson T, Brudin L, Waldenstrom J. 2009.  
513 Effects of influenza A virus infection on migrating mallard ducks. *Proc Biol Sci*  
514 276:1029-36.
- 515 5. Bengtsson D, Safi K, Avril A, Fiedler W, Wikelski M, Gunnarsson G, Elmberg J, Tolf  
516 C, Olsen B, Waldenstrom J. 2016. Does influenza A virus infection affect movement  
517 behaviour during stopover in its wild reservoir host? *R Soc Open Sci* 3:150633.
- 518 6. Verhagen JH, van Dijk JG, Vuong O, Bestebroer T, Lexmond P, Klaassen M, Fouchier  
519 RA. 2014. Migratory birds reinforce local circulation of avian influenza viruses. *PLoS*  
520 *One* 9:e112366.

- 521 7. Hill NJ, Ma EJ, Meixell BW, Lindberg MS, Boyce WM, Runstadler JA. 2016.  
522 Transmission of influenza reflects seasonality of wild birds across the annual cycle.  
523 *Ecol Lett* doi:10.1111/ele.12629.
- 524 8. Alexander DJ. 2007. An overview of the epidemiology of avian influenza. *Vaccine*  
525 25:5637-44.
- 526 9. Lee DH, Bertran K, Kwon JH, Swayne DE. 2017. Evolution, global spread, and  
527 pathogenicity of highly pathogenic avian influenza H5Nx clade 2.3.4.4. *J Vet Sci*  
528 18:269-280.
- 529 10. Verhagen JH, Herfst S, Fouchier RA. 2015. Infectious disease. How a virus travels the  
530 world. *Science* 347:616-7.
- 531 11. Munster VJ, Baas C, Lexmond P, Waldenstrom J, Wallensten A, Fransson T,  
532 Rimmelzwaan GF, Beyer WE, Schutten M, Olsen B, Osterhaus AD, Fouchier RA.  
533 2007. Spatial, temporal, and species variation in prevalence of influenza A viruses in  
534 wild migratory birds. *PLoS Pathog* 3:e61.
- 535 12. Latorre-Margalef N, Tolf C, Grosbois V, Avril A, Bengtsson D, Wille M, Osterhaus AD,  
536 Fouchier RA, Olsen B, Waldenstrom J. 2014. Long-term variation in influenza A virus  
537 prevalence and subtype diversity in migratory mallards in northern Europe. *Proc Biol*  
538 *Sci* 281:20140098.
- 539 13. Lewis NS, Javakhishvili Z, Russell CA, Machabishvili A, Lexmond P, Verhagen JH,  
540 Vuong O, Onashvili T, Donduashvili M, Smith DJ, Fouchier RA. 2013. Avian influenza  
541 virus surveillance in wild birds in Georgia: 2009-2011. *PLoS One* 8:e58534.
- 542 14. Dusek RJ, Hallgrimsson GT, Ip HS, Jonsson JE, Sreevatsan S, Nashold SW, TeSlaa  
543 JL, Enomoto S, Halpin RA, Lin X, Fedorova N, Stockwell TB, Dugan VG, Wentworth  
544 DE, Hall JS. 2014. North Atlantic migratory bird flyways provide routes for  
545 intercontinental movement of avian influenza viruses. *PLoS One* 9:e92075.
- 546 15. Lindsay LL, Kelly TR, Plancarte M, Schobel S, Lin X, Dugan VG, Wentworth DE, Boyce  
547 WM. 2013. Avian influenza: mixed infections and missing viruses. *Viruses* 5:1964-77.
- 548 16. Fries AC, Nolting JM, Bowman AS, Lin X, Halpin RA, Wester E, Fedorova N, Stockwell  
549 TB, Das SR, Dugan VG, Wentworth DE, Gibbs HL, Slemmons RD. 2015. Spread and  
550 persistence of influenza A viruses in waterfowl hosts in the North American Mississippi  
551 migratory flyway. *J Virol* 89:5371-81.
- 552 17. Nolting JM, Fries AC, Gates RJ, Bowman AS, Slemmons RD. 2016. Influenza A Viruses  
553 from Overwintering and Spring-Migrating Waterfowl in the Lake Erie Basin, United  
554 States. *Avian Dis* 60:241-4.
- 555 18. Bahl J, Vijaykrishna D, Holmes EC, Smith GJ, Guan Y. 2009. Gene flow and  
556 competitive exclusion of avian influenza A virus in natural reservoir hosts. *Virology*  
557 390:289-97.
- 558 19. Fourment M, Darling AE, Holmes EC. 2017. The impact of migratory flyways on the  
559 spread of avian influenza virus in North America. *BMC Evol Biol* 17:118.
- 560 20. Chen R, Holmes EC. 2009. Frequent inter-species transmission and geographic  
561 subdivision in avian influenza viruses from wild birds. *Virology* 383:156-61.
- 562 21. Anderson TK, Campbell BA, Nelson MI, Lewis NS, Janas-Martindale A, Killian ML,  
563 Vincent AL. 2015. Characterization of co-circulating swine influenza A viruses in North  
564 America and the identification of a novel H1 genetic clade with antigenic significance.  
565 *Virus Res* 201:24-31.
- 566 22. Lewis NS, Verhagen JH, Javakhishvili Z, Russell CA, Lexmond P, Westgeest KB,  
567 Bestebroer TM, Halpin RA, Lin X, Ransier A, Fedorova NB, Stockwell TB, Latorre-  
568 Margalef N, Olsen B, Smith G, Bahl J, Wentworth DE, Waldenstrom J, Fouchier RA,  
569 de Graaf M. 2015. Influenza A virus evolution and spatio-temporal dynamics in  
570 Eurasian wild birds: a phylogenetic and phylogeographical study of whole-genome  
571 sequence data. *J Gen Virol* 96:2050-60.
- 572 23. OIE. 2015. Avian influenza (Infection with avian influenza viruses), Avian influenza  
573 (infection with avian influenza viruses): Manual of Diagnostic Tests and Vaccines for  
574 Terrestrial Animals. World Organisation for Animal Health (OIE), Paris, France.



- 575 24. Zhou B, Donnelly ME, Scholes DT, St George K, Hatta M, Kawaoka Y, Wentworth DE.  
576 2009. Single-reaction genomic amplification accelerates sequencing and vaccine  
577 production for classical and Swine origin human influenza A viruses. *J Virol* 83:10309-  
578 13.
- 579 25. Zhou B, Wentworth DE. 2012. Influenza A virus molecular virology techniques.  
580 *Methods Mol Biol* 865:175-92.
- 581 26. Munster VJ, Baas C, Lexmond P, Bestebroer TM, Guldemeester J, Beyer WEP, de  
582 Wit E, Schutten M, Rimmelzwaan GF, Osterhaus ADME, Fouchier RAM. 2009.  
583 Practical considerations for high-throughput influenza A virus surveillance studies of  
584 wild birds by use of molecular diagnostic tests. *Journal of Clinical Microbiology* 47:666-  
585 673.
- 586 27. Mena I, Nelson MI, Quezada-Monroy F, Dutta J, Cortes-Fernandez R, Lara-Puente  
587 JH, Castro-Peralta F, Cunha LF, Trovao NS, Lozano-Dubernard B, Rambaut A, van  
588 Bakel H, Garcia-Sastre A. 2016. Origins of the 2009 H1N1 influenza pandemic in swine  
589 in Mexico. *Elife* 5.
- 590 28. Katoh K, Standley DM. 2013. MAFFT multiple sequence alignment software version  
591 7: improvements in performance and usability. *Mol Biol Evol* 30:772-80.
- 592 29. McCauley J, Bye J, Elder K, Gething MJ, Skehel JJ, Smith A, Waterfield MD. 1979.  
593 Influenza virus haemagglutinin signal sequence. *FEBS Lett* 108:422-6.
- 594 30. Burke DF, Smith DJ. 2014. A recommended numbering scheme for influenza A HA  
595 subtypes. *PLoS One* 9:e112302.
- 596 31. Kumar S, Stecher G, Tamura K. 2016. MEGA7: Molecular Evolutionary Genetics  
597 Analysis Version 7.0 for Bigger Datasets. *Mol Biol Evol* 33:1870-4.
- 598 32. Nguyen LT, Schmidt HA, von Haeseler A, Minh BQ. 2015. IQ-TREE: a fast and  
599 effective stochastic algorithm for estimating maximum-likelihood phylogenies. *Mol Biol*  
600 *Evol* 32:268-74.
- 601 33. Kalyaanamoorthy S, Minh BQ, Wong TKF, von Haeseler A, Jermin LS. 2017.  
602 ModelFinder: fast model selection for accurate phylogenetic estimates. *Nat Methods*  
603 14:587-589.
- 604 34. Rambaut A, Lam TT, Max Carvalho L, Pybus OG. 2016. Exploring the temporal  
605 structure of heterochronous sequences using TempEst (formerly Path-O-Gen). *Virus*  
606 *Evol* 2:vew007.
- 607 35. Bell SM, Bedford T. 2017. Modern-day SIV viral diversity generated by extensive  
608 recombination and cross-species transmission. *PLoS Pathog* 13:e1006466.
- 609 36. Pfeifer B, Wittelsburger U, Ramos-Onsins SE, Lercher MJ. 2014. PopGenome: an  
610 efficient Swiss army knife for population genomic analyses in R. *Mol Biol Evol* 31:1929-  
611 36.
- 612 37. Parker J, Rambaut A, Pybus OG. 2008. Correlating viral phenotypes with phylogeny:  
613 accounting for phylogenetic uncertainty. *Infect Genet Evol* 8:239-46.
- 614 38. Ronquist F, Teslenko M, van der Mark P, Ayres DL, Darling A, Höhna S, Larget B, Liu  
615 L, Suchard MA, Huelsenbeck JP. 2012. MrBayes 3.2: efficient Bayesian phylogenetic  
616 inference and model choice across a large model space. *Syst Biol* 61:539-42.
- 617 39. Drummond AJ, Suchard MA, Xie D, Rambaut A. 2012. Bayesian phylogenetics with  
618 BEAUti and the BEAST 1.7. *Mol Biol Evol* 29:1969-73.
- 619 40. Fu L, Niu B, Zhu Z, Wu S, Li W. 2012. CD-HIT: accelerated for clustering the next-  
620 generation sequencing data. *Bioinformatics* 28:3150-2.
- 621 41. Li W, Godzik A. 2006. Cd-hit: a fast program for clustering and comparing large sets  
622 of protein or nucleotide sequences. *Bioinformatics* 22:1658-9.
- 623 42. Kawaoka Y, Gorman OT, Ito T, Wells K, Donis RO, Castrucci MR, Donatelli I, Webster  
624 RG. 1998. Influence of host species on the evolution of the nonstructural (NS) gene of  
625 influenza A viruses. *Virus Res* 55:143-56.
- 626 43. Nelson MI, Detmer SE, Wentworth DE, Tan Y, Schwartzbard A, Halpin RA, Stockwell  
627 TB, Lin X, Vincent AL, Gramer MR, Holmes EC. 2012. Genomic reassortment of  
628 influenza A virus in North American swine, 1998-2011. *J Gen Virol* 93:2584-9.

- 629 44. Lu L, Lycett SJ, Leigh Brown AJ. 2014. Reassortment patterns of avian influenza virus  
630 internal segments among different subtypes. *BMC Evol Biol* 14:16.  
631 45. Ma HC, Chen JM, Chen JW, Sun YX, Li JM, Wang ZL. 2007. The panorama of the  
632 diversity of H5 subtype influenza viruses. *Virus Genes* 34:283-7.  
633 46. Tonnessen R, Hauge AG, Hansen EF, Rimstad E, Jonassen CM. 2013. Host  
634 restrictions of avian influenza viruses: in silico analysis of H13 and H16 specific  
635 signatures in the internal proteins. *PLoS One* 8:e63270.

636

**Figure 1.** HA subtype-wise breakdown (A) and overall (B) yearly prevalence of viruses in Georgia during 2010-16. X-axis marks year of isolation. In bar chart 1A the Y-axis marks the proportion virus-positive samples +/- standard deviation and bars are colored according to host from which virus was isolated (duck in pink and gull in green). In heat map 1B, the Y-axis shows the HA subtypes of viruses isolated and squares are colored according to the number of isolates of each type identified.

A

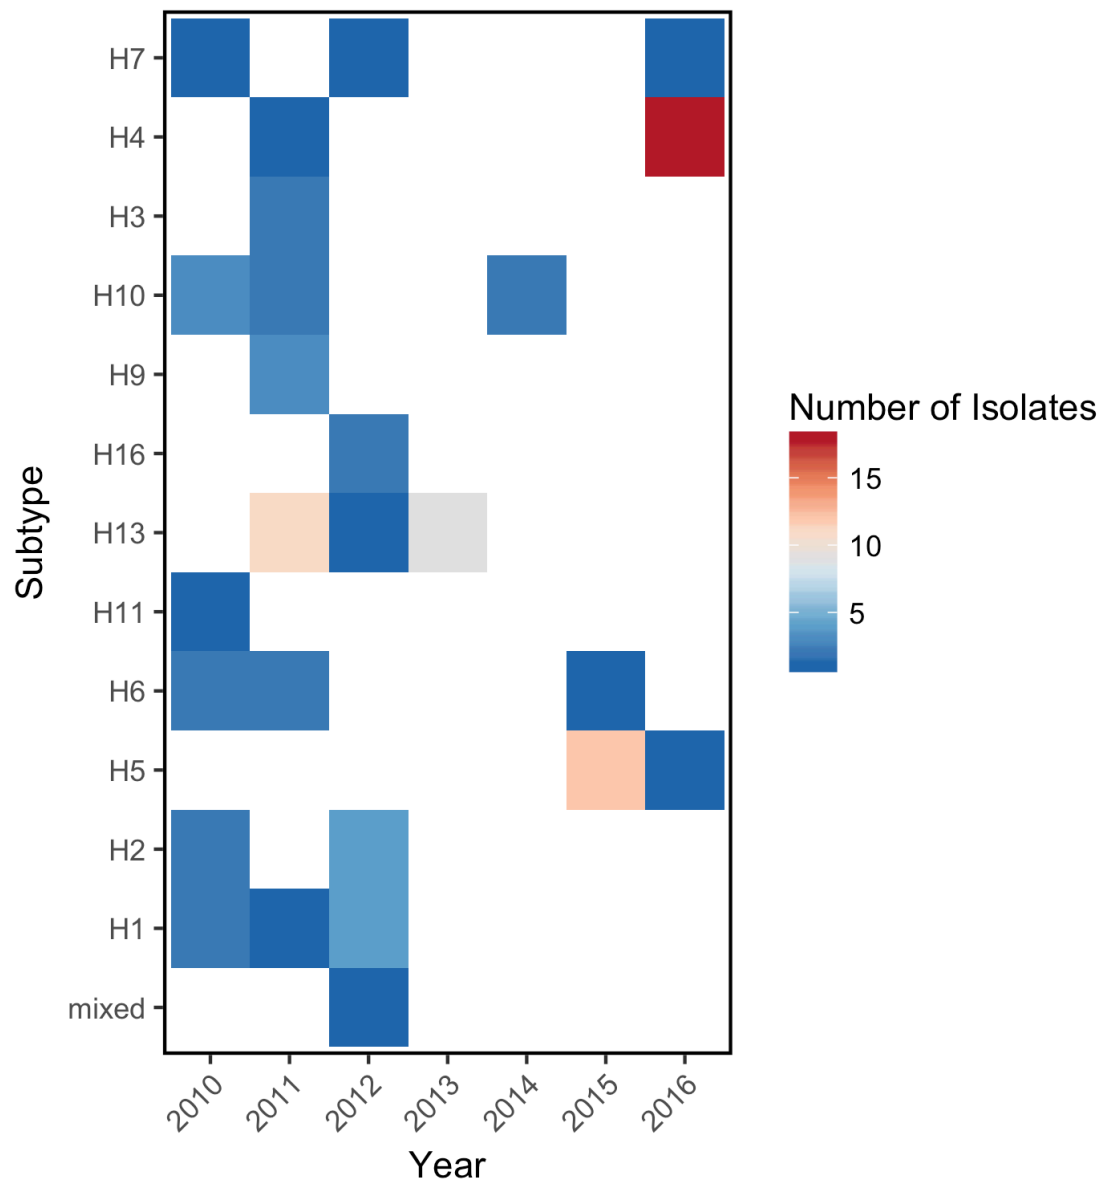

B

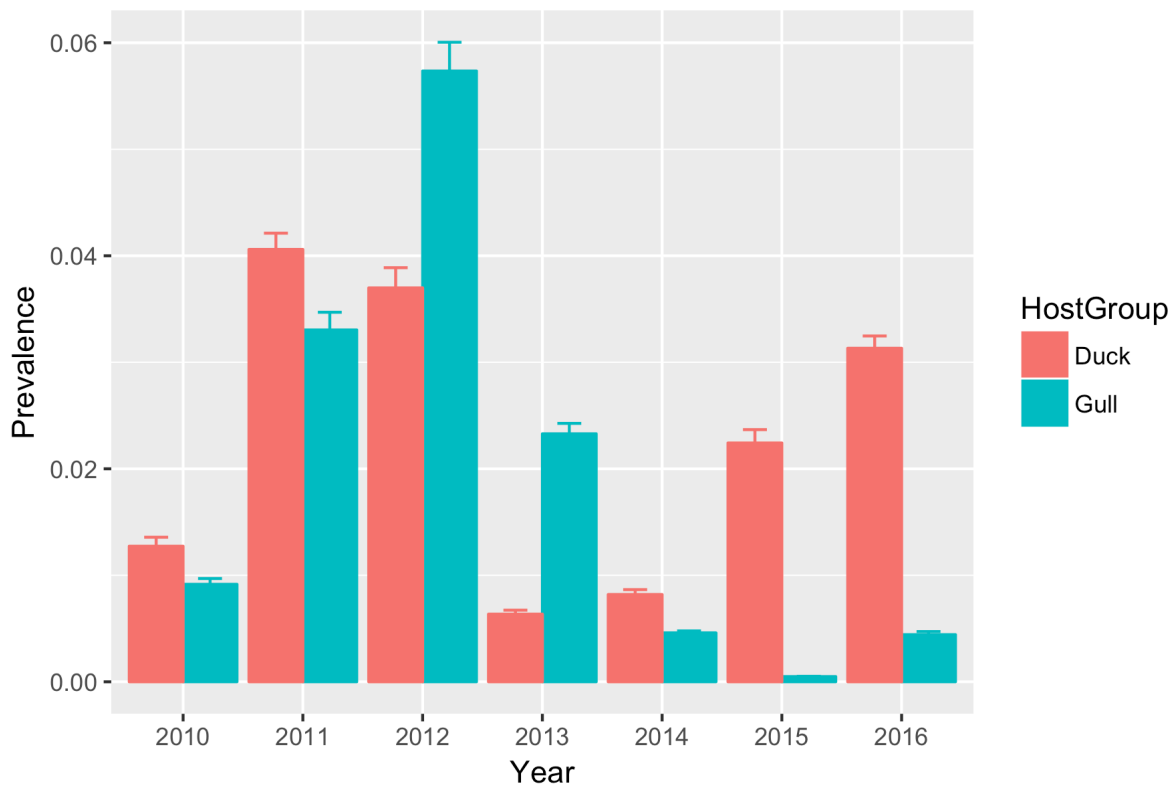

**Figure 2.** Maximum-likelihood trees for all internal genes – PB2, PB1, MP, NS, NP and PA, from equivalent strains connected across the trees. Tips and connecting lines are coloured according to host type –mallards (MD) bright red and other ducks (OD) orange, yellow-legged and armenian gulls (YAG) in blue and black-headed and mediterranean gulls (BMG) in light blue).

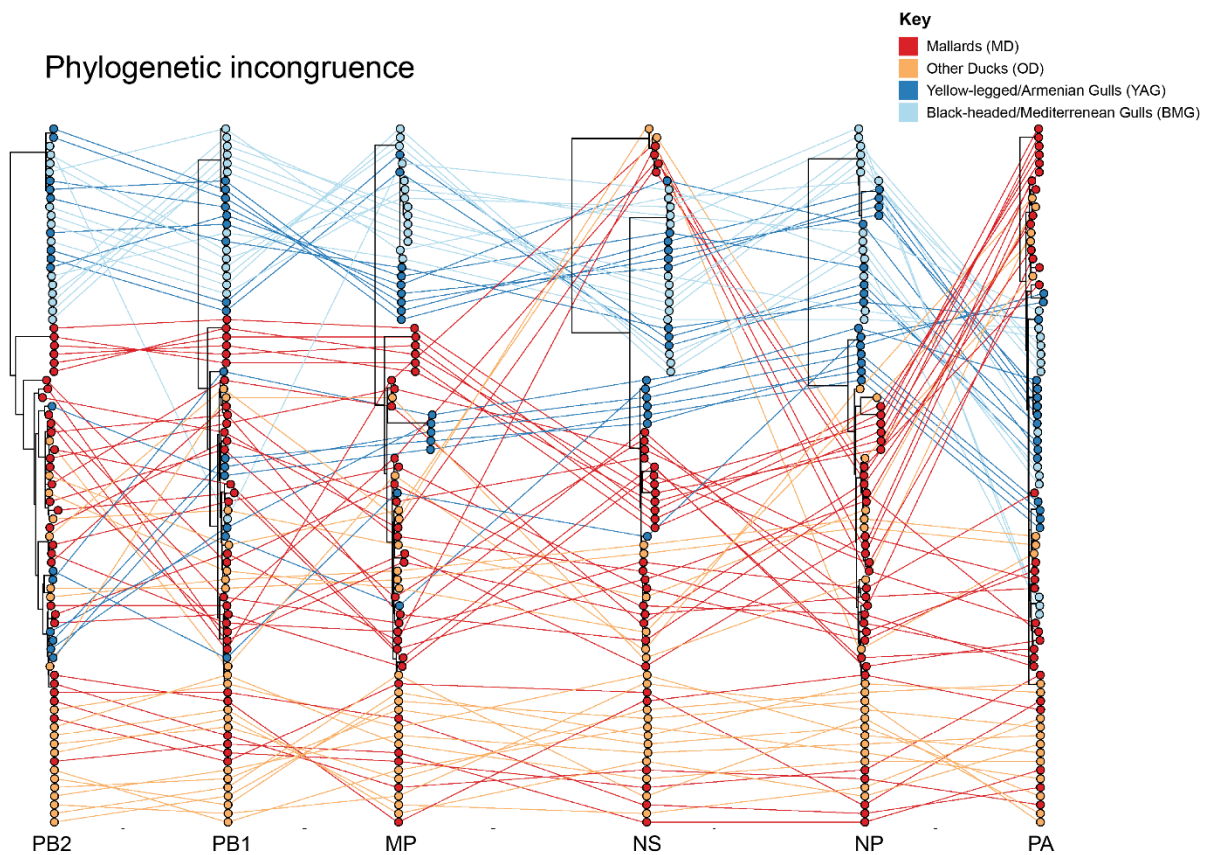

**Figure 3.** Overall per-site nucleotide diversity defined as average number of nucleotide differences per site between two sequences in all possible pairs in the sample population, normalised to the number of sequences in each population. Comparison between (A) gulls and ducks. (B) host-types (MD, OD, YAG, BMG) and (C) HA type are shown.

A

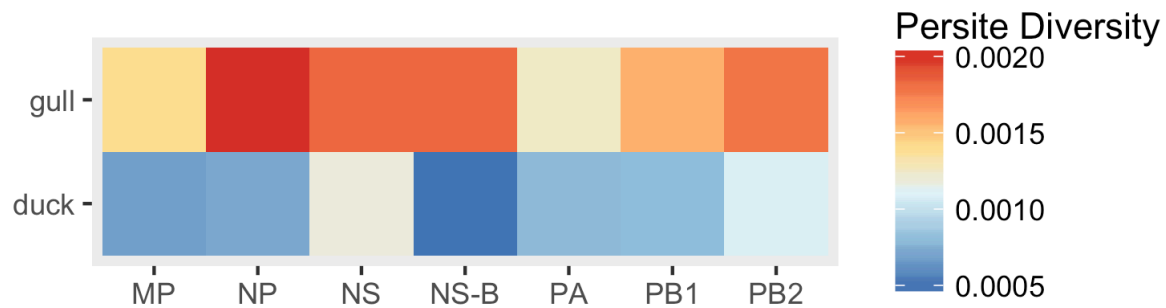

B

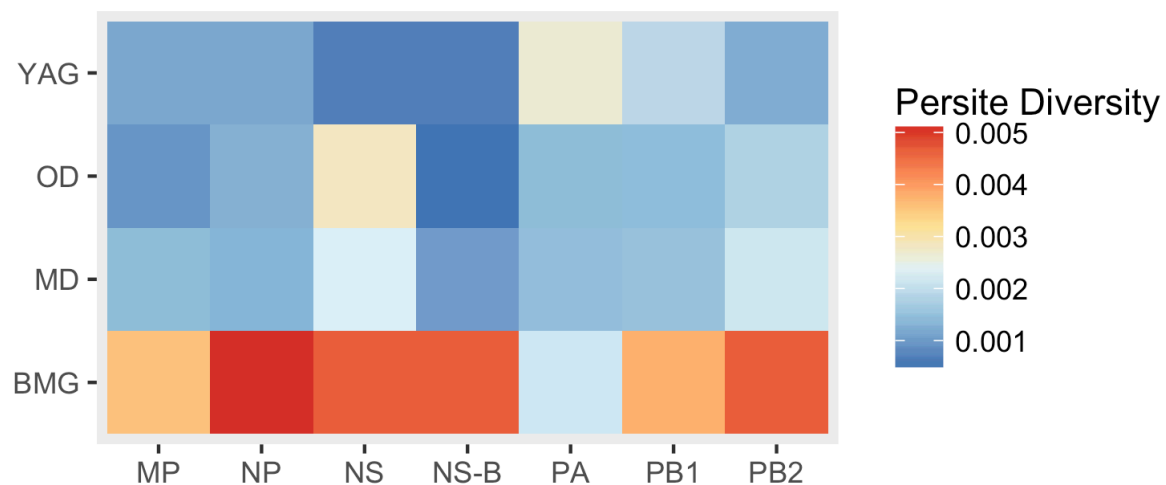



**Figure 4.** Overall/summary (A) and over-time/skyline (B) mean diversity for each segment from gulls (green) and ducks (pink) as determined by posterior analysis of coalescent trees (PACT). Here, diversity is defined as the average time to coalescence for pairs of lineages belonging to each host. Panel (C) shows overall/summary mean diversity values for ducks divided in to MD, OD (light and dark blue), and gulls divided into BMG and YAG (light and dark green).

A

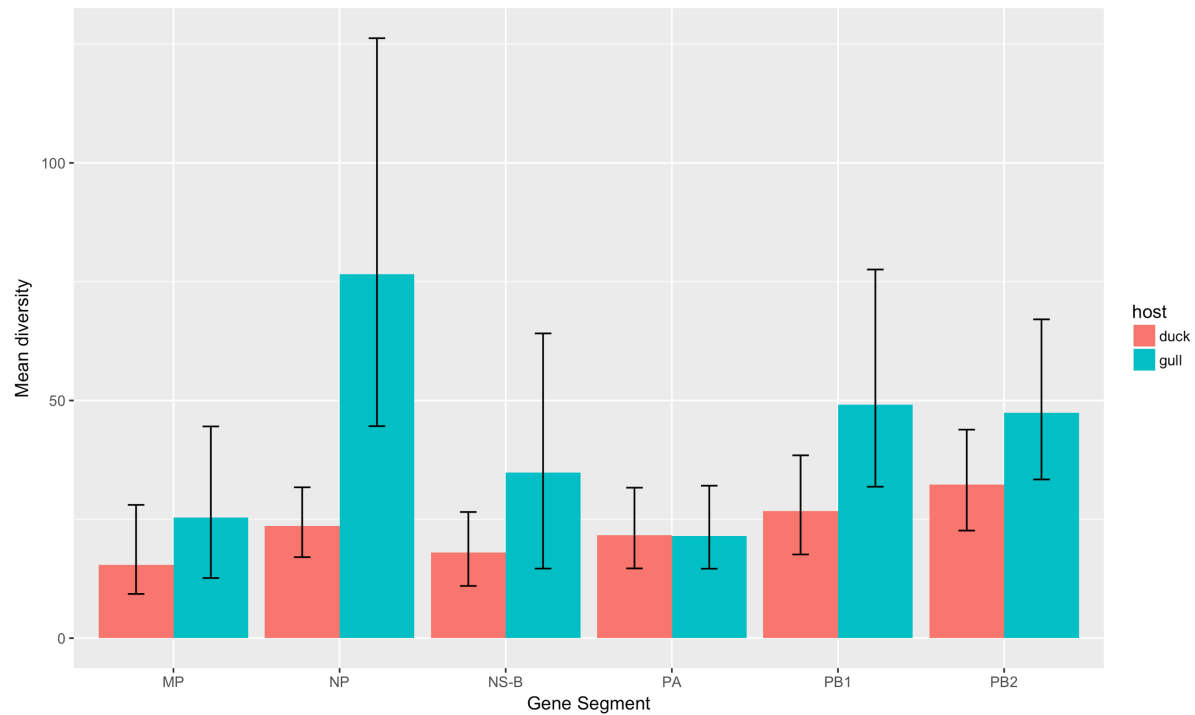

B

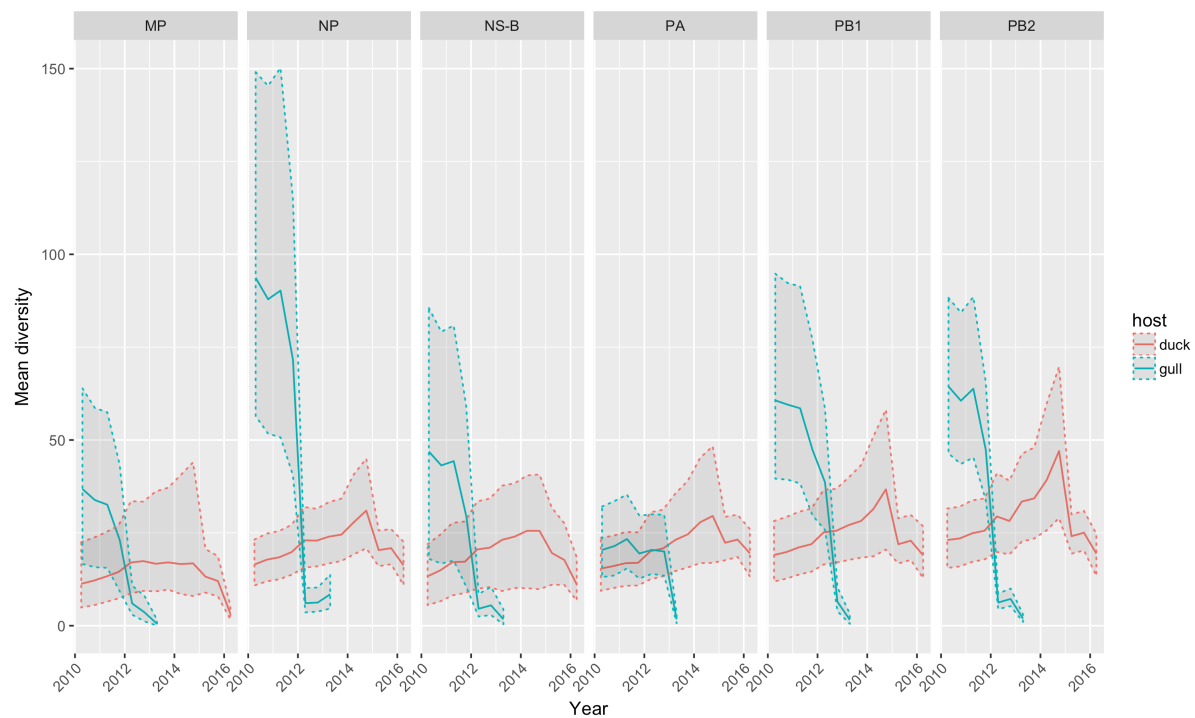



C

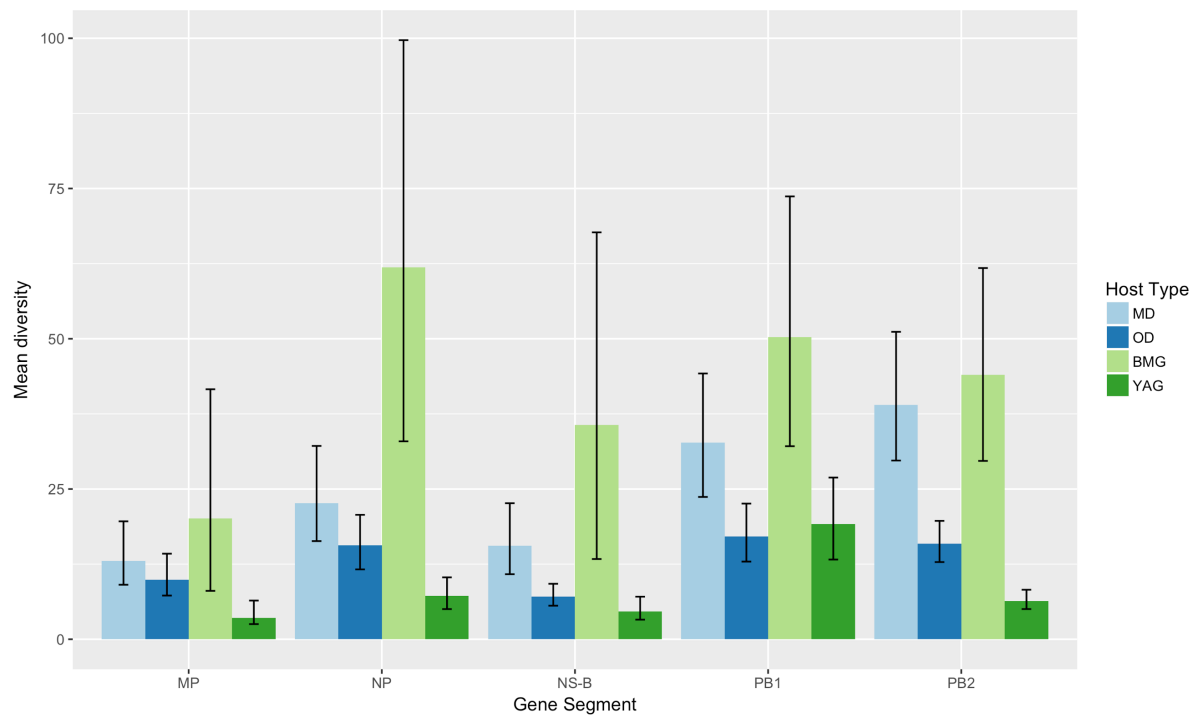

**Figure 5.** Summaries of expected/observed ratios from Bayesian Tip-association Significance testing (BaTS) for all internal genes. Higher values indicate less phylogenetic clustering by trait and hence higher rates of mixed ancestry. Comparison between (A) gulls and ducks. (B) host-types (MD, OD, YAG, BMG) and (C) HA type are shown. Asterisks indicate p-values (\*\*\*) < 0.001, \*\* < 0.01, \* < 0.05 and no asterisk > 0.05).

A

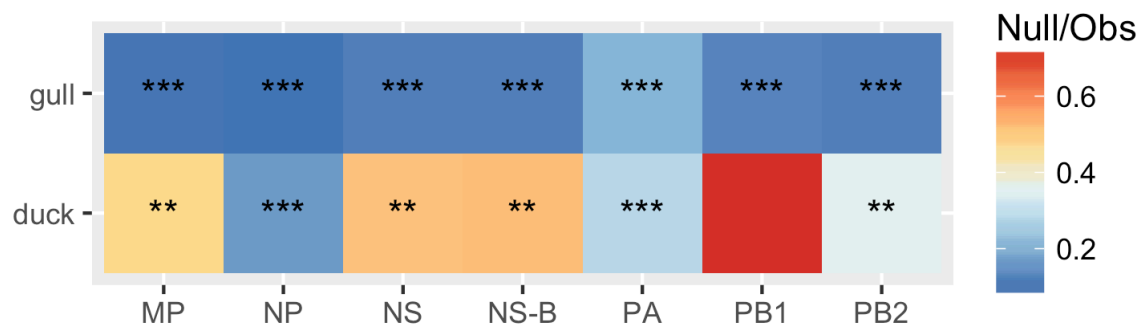

B

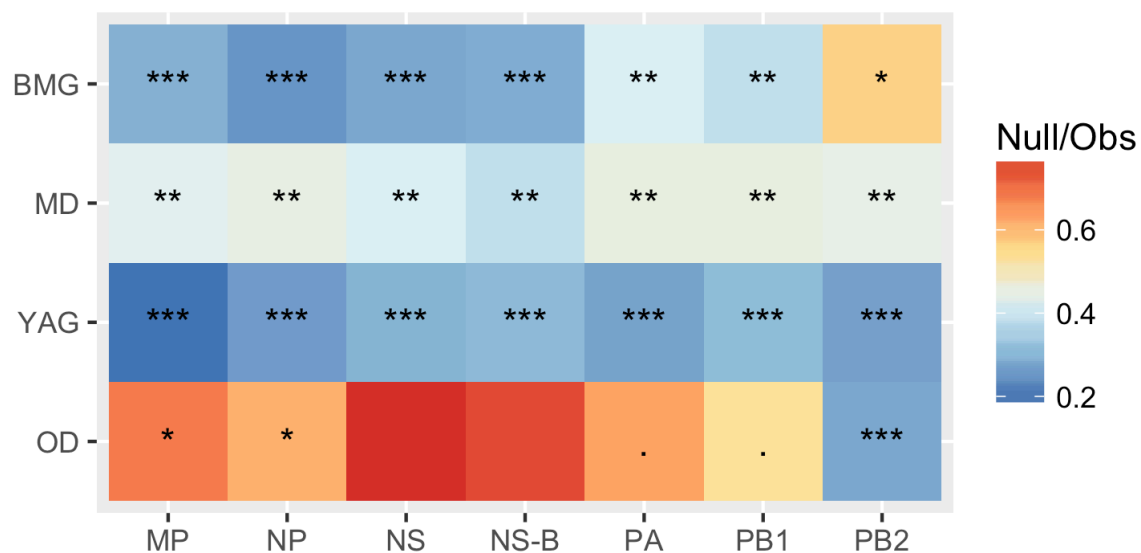

C

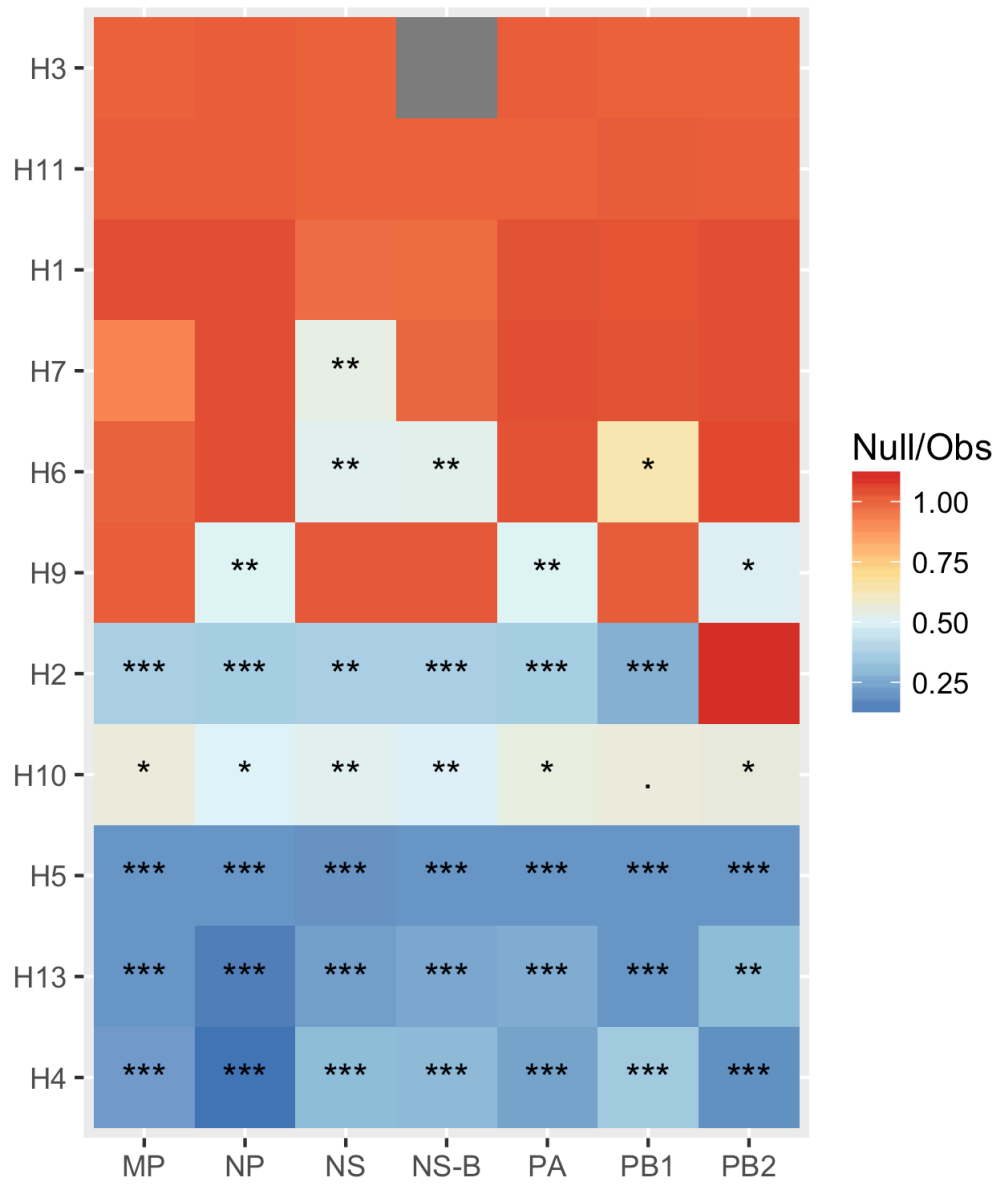

**Figure 6A.** Summary of mean migration events between hosts in the direction from (A) duck to gull and gull to duck, and (B) between different host types - Mallards (MD), other ducks (OD), Black-headed and Mediterranean gulls (BMG) and Yellow-legged and Armenian gulls (YAG) derived from the genealogy.

A

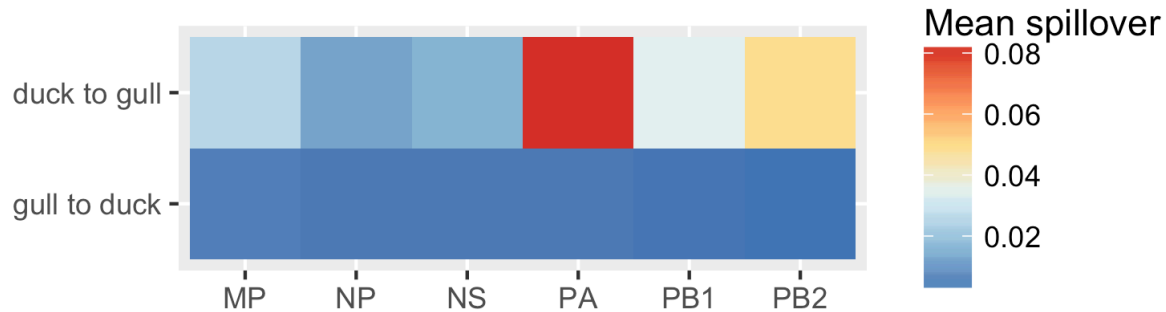

B

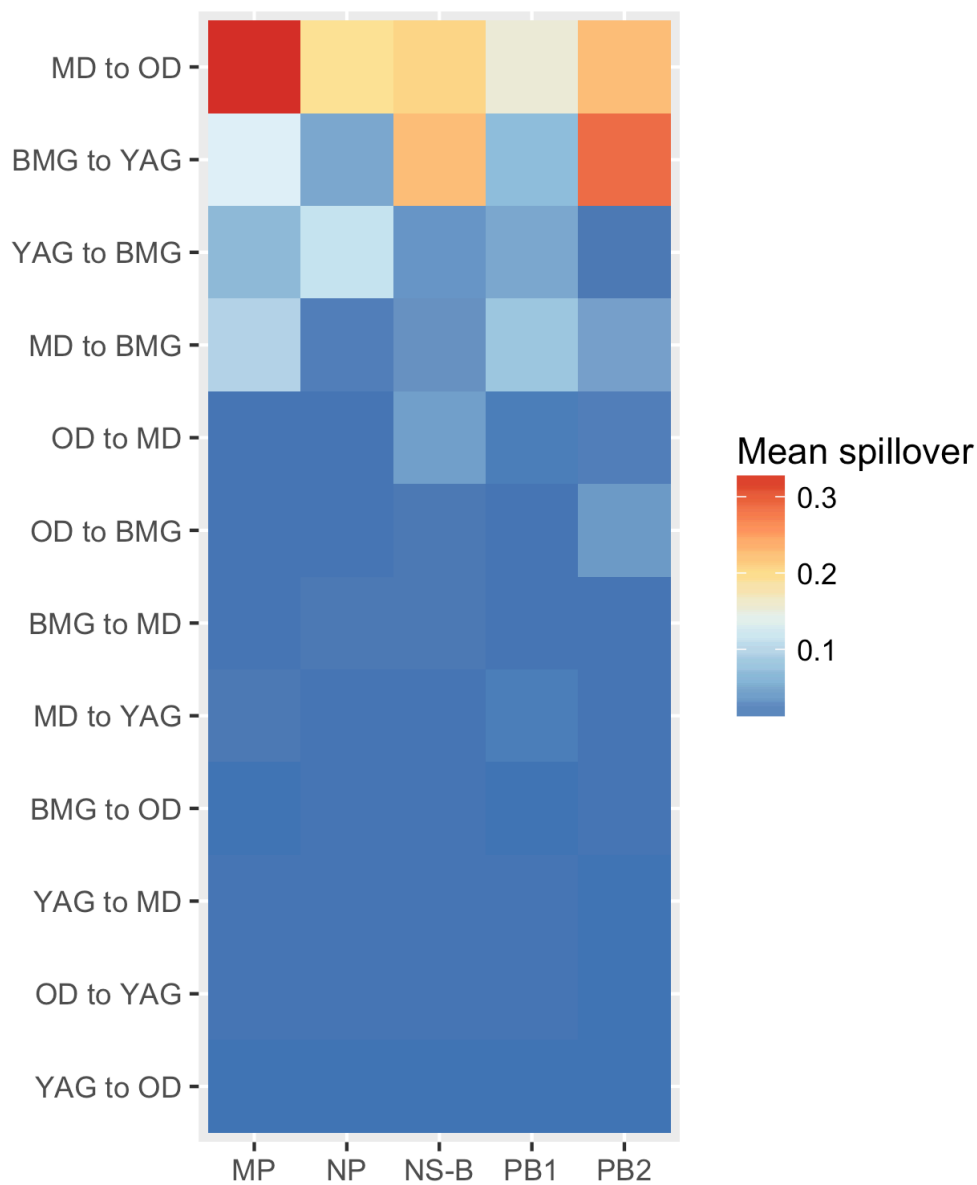

**Figure 7A.** BEAST MCC (median-clade credibility) trees from viral sequences NP gene sequences isolated world-wide from avian hosts between 2005 and 2016. Branches are coloured according to location, observed at the tips and estimated at internal nodes by ancestral reconstruction of discrete trait. Africa, Asia, Europe in very dark, dark and light purple, Georgian sequences from this study in light green, North and South America in dark and very dark green.

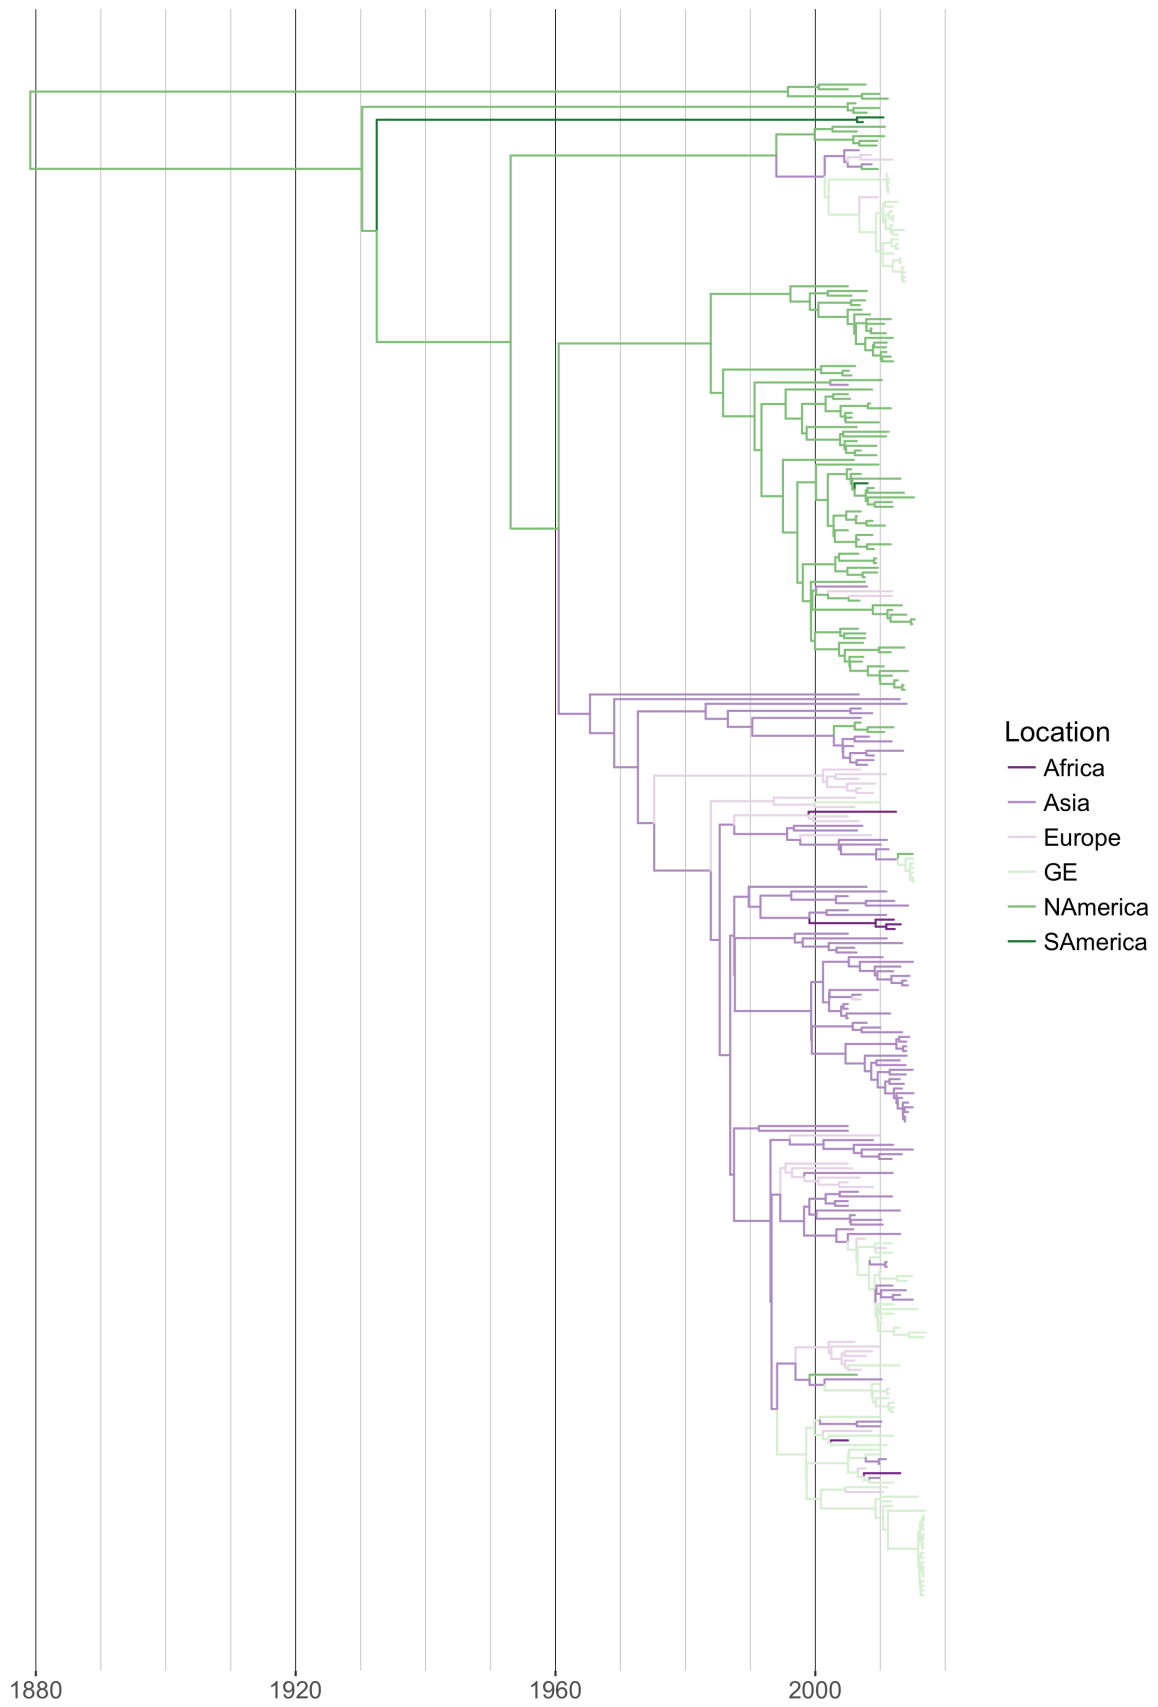

**Figure 7B.** Circularised graph shows overall rates of migration, defined as the rate at which labels (locations) change over the course of the genealogy, between Georgia and other locations. Arrow heads indicate direction of migration; rates are measured as migration events per lineage per year (indicated by the width of the arrow). Asia in blood orange, Africa in orange, Georgia in yellow, Europe in green, South America in teal and North America in blue.

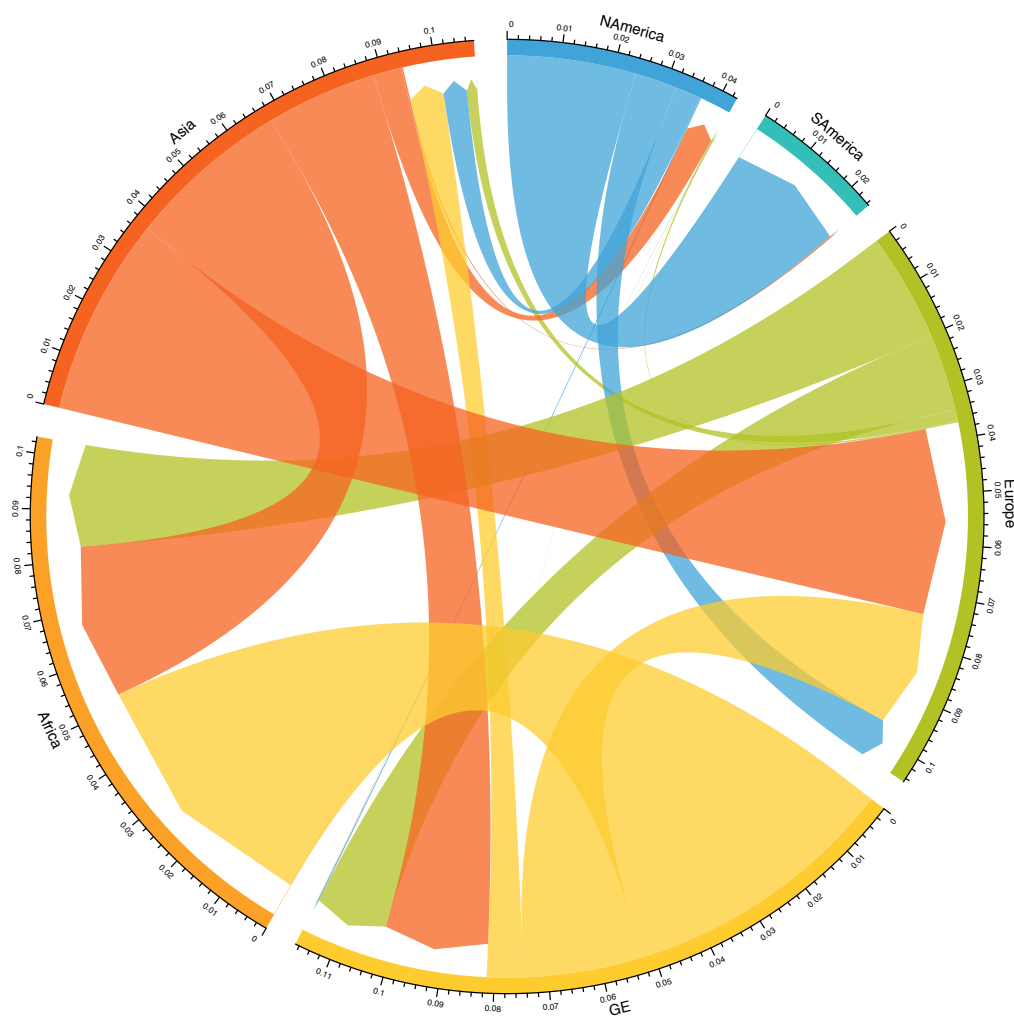

Source: https://www.biorxiv.org/content/10.1101/282491v1.full.pdf
